# Supplementary material for: Newly synthesized series of oxoindole–oxadiazole conjugates as potential anti-SARS-CoV-2 agents:in silicoandin vitrostudies
Source: Royal Society of Chemistry journal article supplement (doi:10.1039/d1nj04816c), 2022-01-01
Supplement: d1nj04816c2.pdf [file d1nj04816c2.pdf]

## Newly Synthesized Series of Oxindole-Oxadiazole Conjugates as Potential Anti-SARS-CoV-2 Agents: *In Silico* and *In Vitro* Studies

Rana M. El-Masry<sup>a</sup>, Ahmed A. Al Karmalawy<sup>b\*</sup>, Radwan Alnajjar<sup>c,d</sup>, Sara H. Mahmoud<sup>e</sup>, Ahmed Mostafa<sup>e</sup>, Hanan H. Kadry<sup>f</sup>, Sahar M. Abou-Seri<sup>g\*</sup>, Azza T. Taher<sup>f,h\*</sup>

<sup>a</sup> Organic Chemistry Department, Faculty of Pharmacy, October University for Modern Sciences and Arts (MSA), October 6 city, Giza, Egypt

<sup>b</sup> Department of Pharmaceutical Medicinal Chemistry, Faculty of Pharmacy, Horus University-Egypt, New Damietta 34518, Egypt.

<sup>c</sup> Department of Chemistry, Faculty of Science, University of Benghazi, Benghazi, Libya.

<sup>d</sup> Department of Chemistry, University of Cape Town, Rondebosch 7701, South Africa.

<sup>e</sup> Center of Scientific Excellence for Influenza Viruses, National Research Centre (NRC), Dokki, Giza 12622, Egypt.

<sup>f</sup> Department of Pharmaceutical Organic Chemistry, Faculty of Pharmacy, Cairo University, Cairo, Egypt.

<sup>g</sup> Department of Pharmaceutical Chemistry, Faculty of Pharmacy, Cairo University, Cairo, Egypt.

<sup>h</sup> Department of Organic Pharmaceutical Chemistry, Faculty of Pharmacy, October 6 University (O6U), October 6 city, Giza, Egypt.

**Figure SI1:** 2D and 3D docking representations of the seven newly synthesized Oxindole-Oxadiazole conjugates and the previously reported one (**I<sub>a</sub>**) compared to the docked N3 inhibitor against its binding site inside the COVID-19 main protease.

| No. | Tested comp.           | 2D | 3D                                                                                                     |
|-----|------------------------|----|--------------------------------------------------------------------------------------------------------|
|     |                        |    | <p>Red dashed lines refer to hydrogen bonds, while the black ones denote hydrophobic interactions.</p> |
| 1   | <b>III<sub>a</sub></b> |    |                                                                                                        |
| 2   | <b>III<sub>b</sub></b> |    |                                                                                                        |

|   |                  |                                                                                     |                                                                                      |
|---|------------------|-------------------------------------------------------------------------------------|--------------------------------------------------------------------------------------|
| 3 | III <sub>c</sub> | 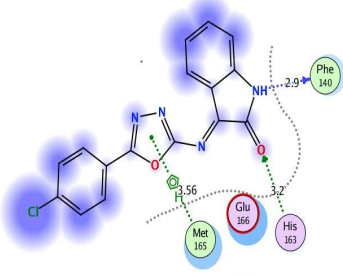   | 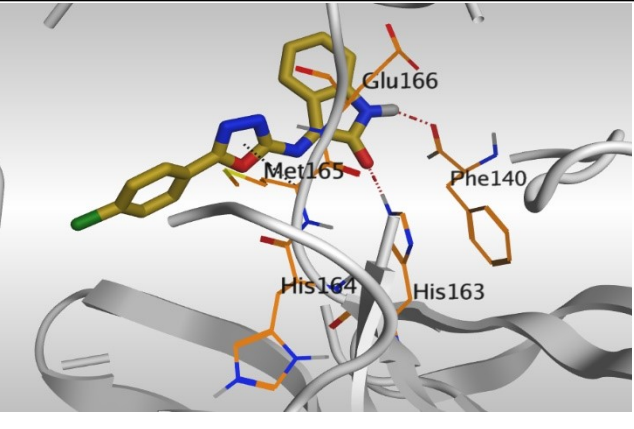   |
| 4 | III <sub>d</sub> | 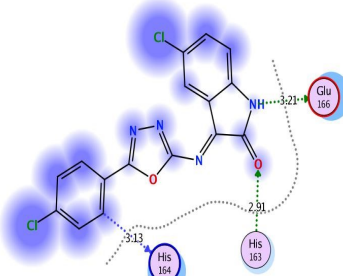   | 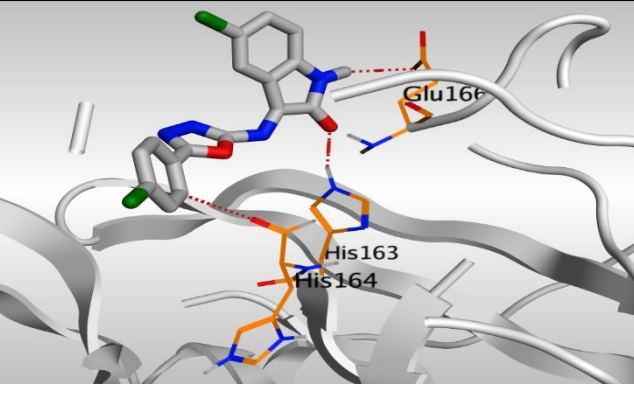  |
| 5 | III <sub>e</sub> | 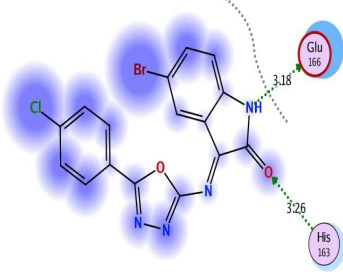 | 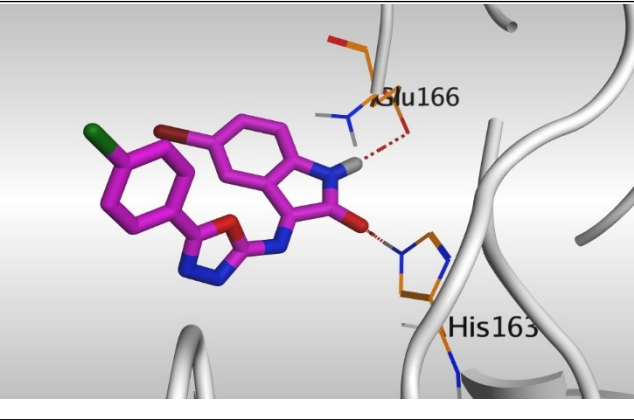 |
| 6 | III <sub>f</sub> | 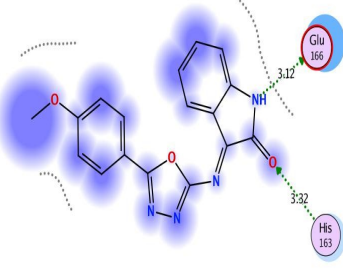 | 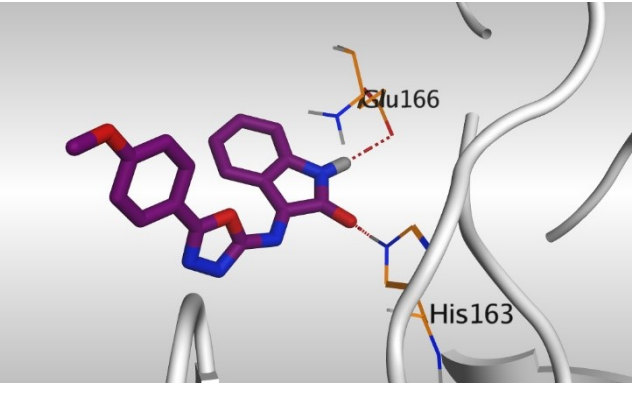 |

|   |                        |                                                                                     |                                                                                     |
|---|------------------------|-------------------------------------------------------------------------------------|-------------------------------------------------------------------------------------|
| 7 | <b>III<sub>g</sub></b> | 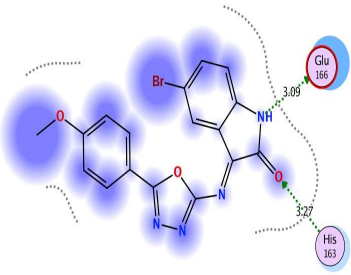   | 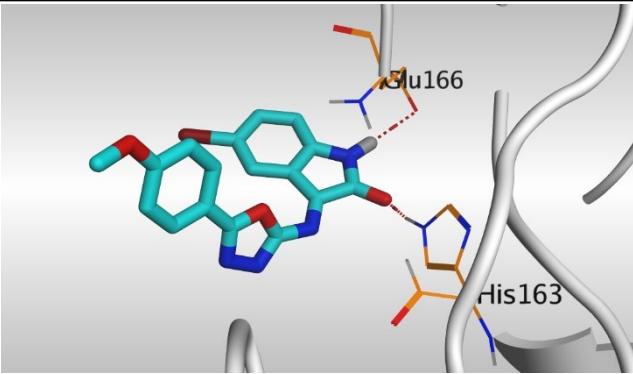  |
| 8 | <b>I<sub>a</sub></b>   | 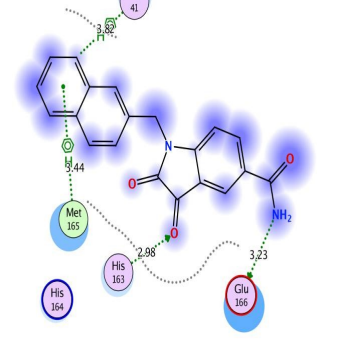   | 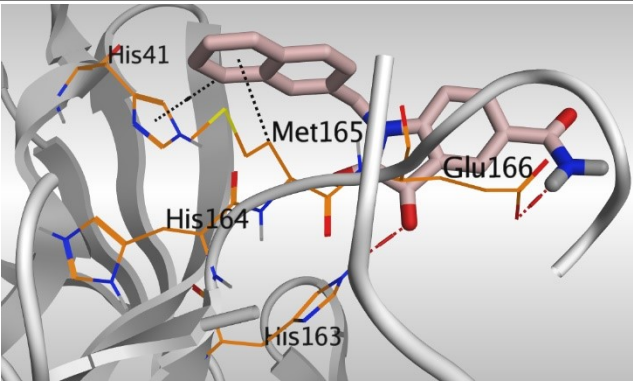  |
| 9 | <b>N3</b>              | 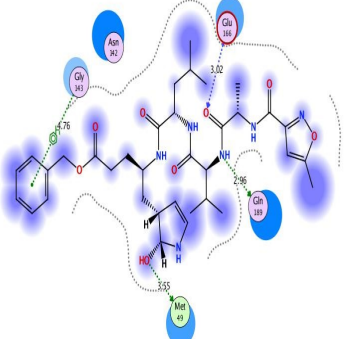 | 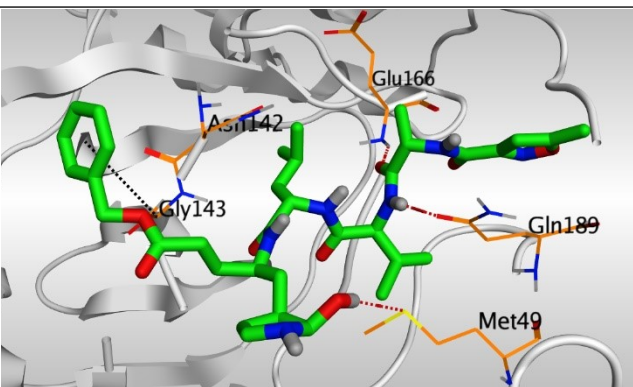 |

**Figure SI2:** **A)** Surface of the COVID-19 main protease pocket showing the positioning and fitting of the tested compounds, **B)** surface and maps of the tested compounds and the previously reported one (Ia) compared to the docked N3 inhibitor against its binding site inside the COVID-19 main protease.

| No. | Tested comp.     | A                                                                                   | B                                                                                    |
|-----|------------------|-------------------------------------------------------------------------------------|--------------------------------------------------------------------------------------|
| 1   | III <sub>a</sub> | 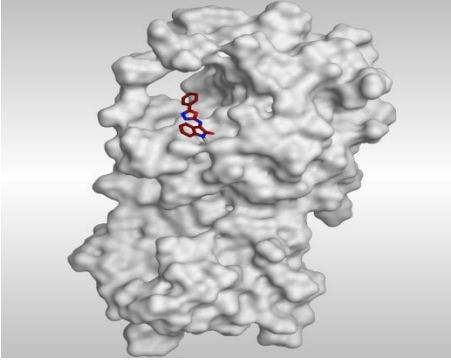   | 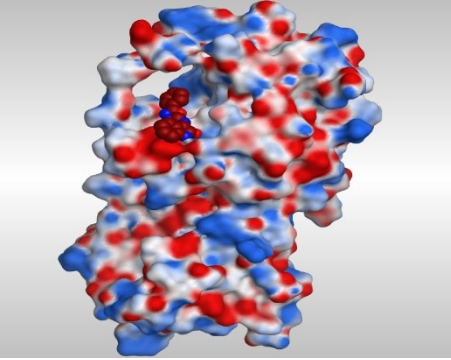   |
| 2   | III <sub>b</sub> | 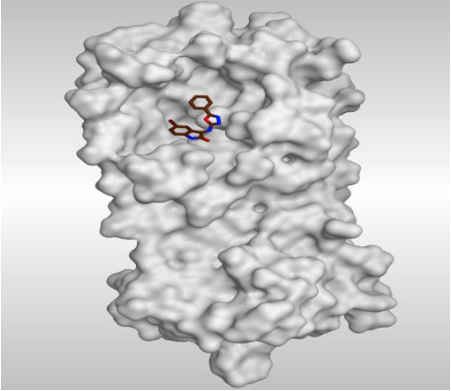  | 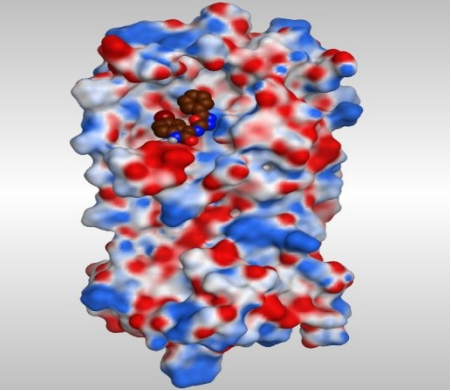  |
| 3   | III <sub>c</sub> | 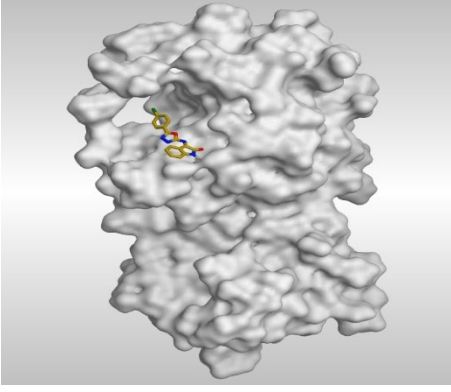 | 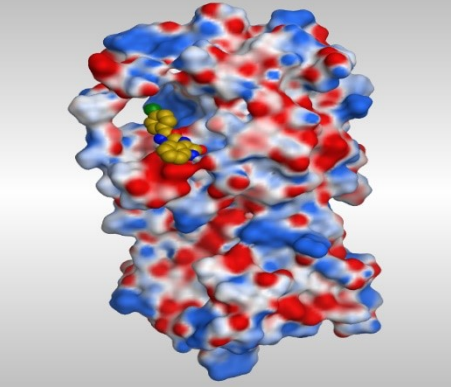 |

|   |                  |                                                                                     |                                                                                      |
|---|------------------|-------------------------------------------------------------------------------------|--------------------------------------------------------------------------------------|
| 4 | III <sub>d</sub> | 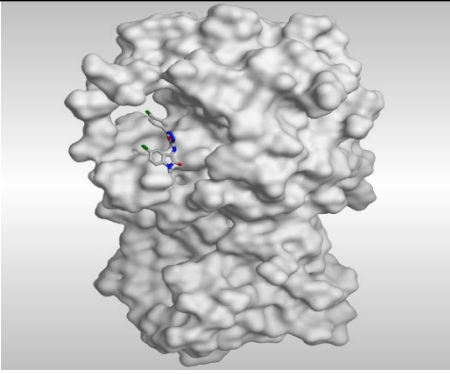   | 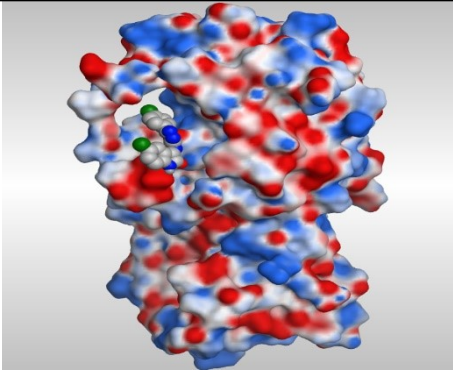   |
| 5 | III <sub>e</sub> | 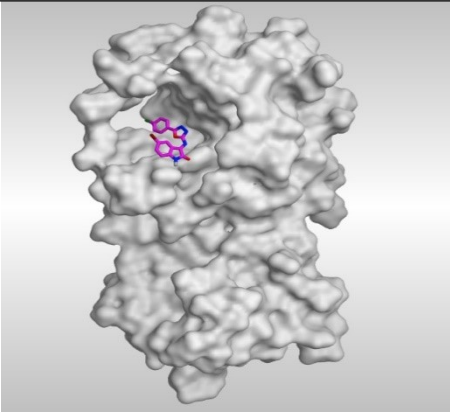   | 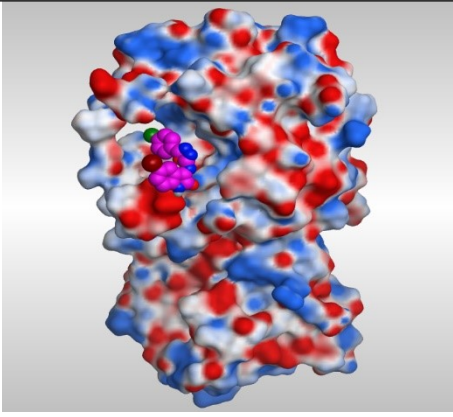   |
| 6 | III <sub>f</sub> | 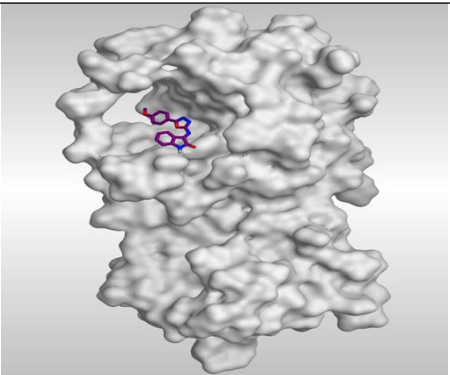 | 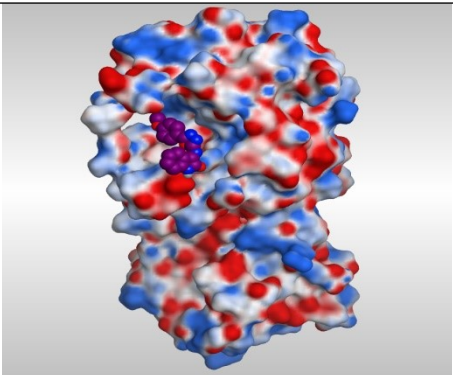 |
| 7 | III <sub>g</sub> | 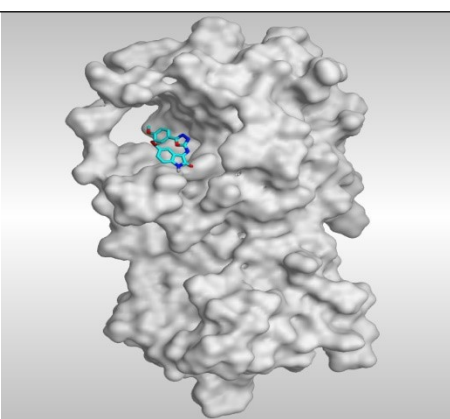 | 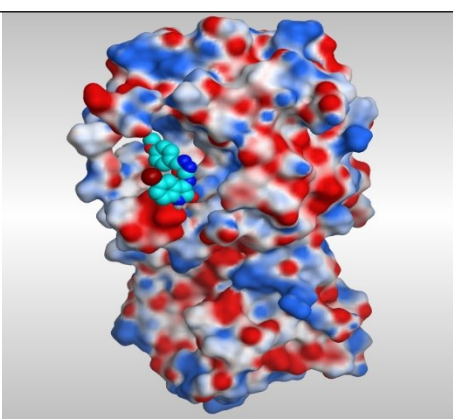 |

|   |                      |                                                                                   |                                                                                    |
|---|----------------------|-----------------------------------------------------------------------------------|------------------------------------------------------------------------------------|
| 8 | <b>I<sub>a</sub></b> | 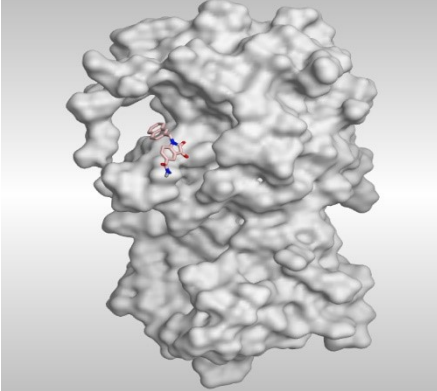 | 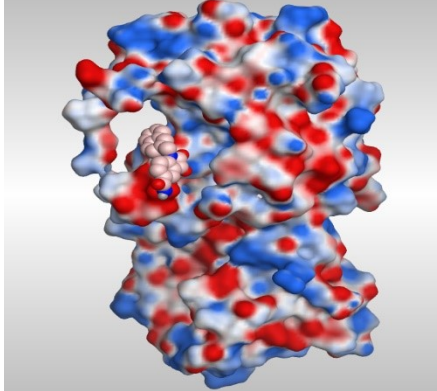 |
| 9 | <b>N3</b>            | 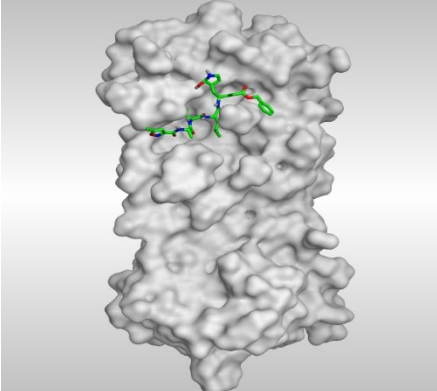 | 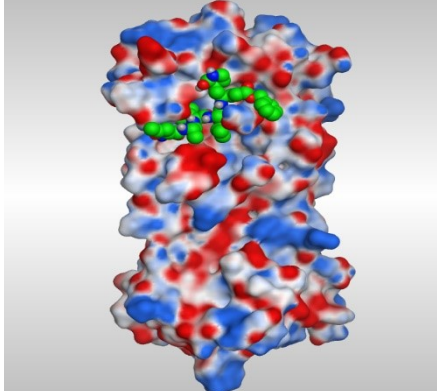 |

**Figure SI3:** 2 D diagram (a), 3 D representation (b), and protein positioning (c and d) of the superimposition of the co-crystallized (red) and the docked pose (green), respectively, of N3 inhibitor inside the COVID-19 main protease binding site with RMSD of 1.46 Å.

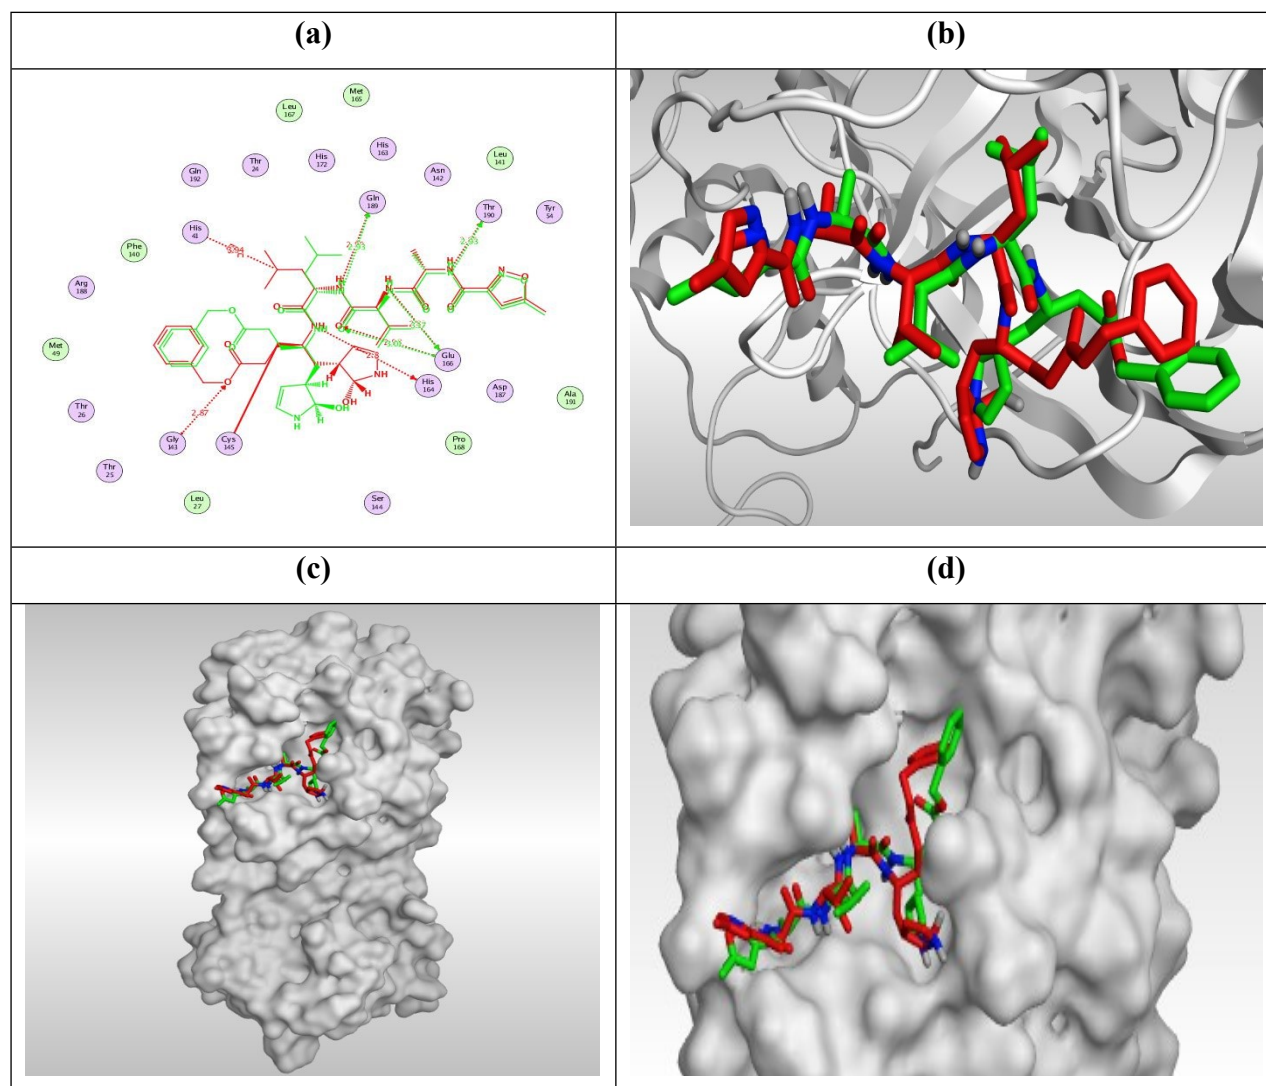

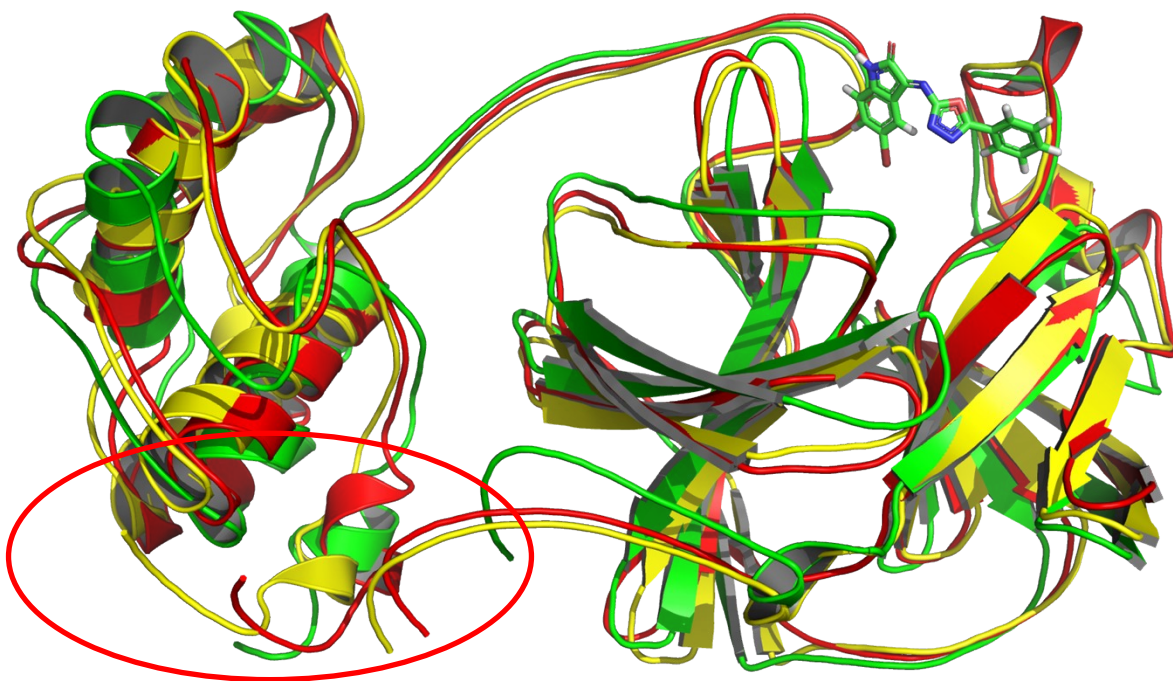

**Figure SI4:** The aligned structures of IVE\_4-6LU7 during simulation; green 0ns, yellow 50ns, red 100 ns.

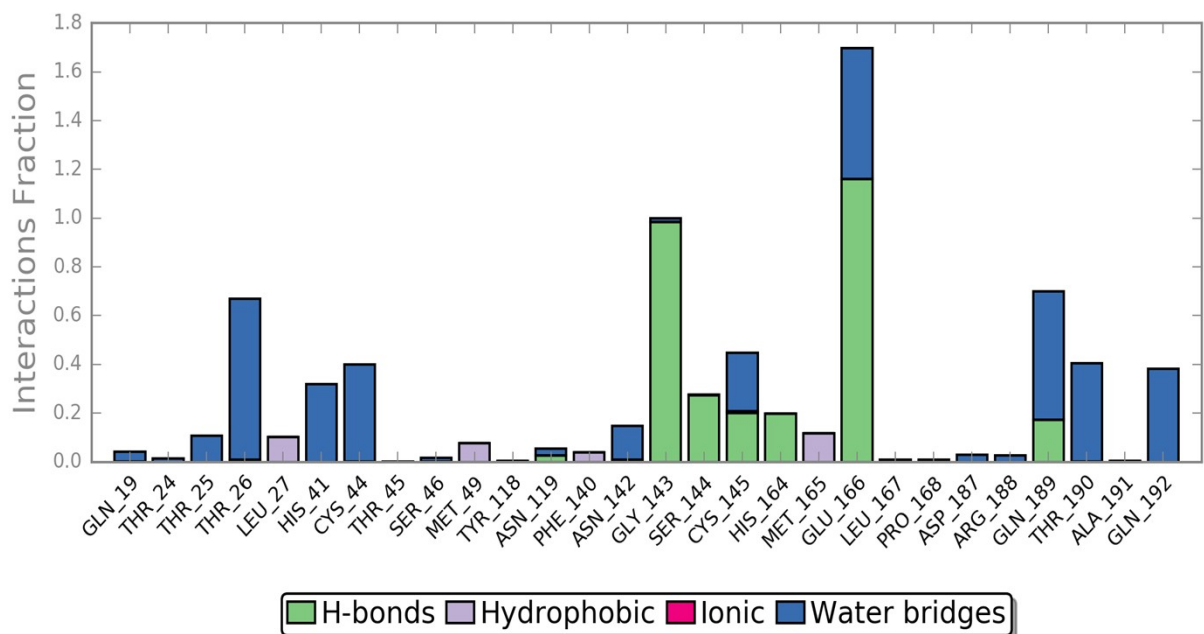

**Figure SI5:** The histogram of N3 - 6LU7 contact throughout the trajectory.

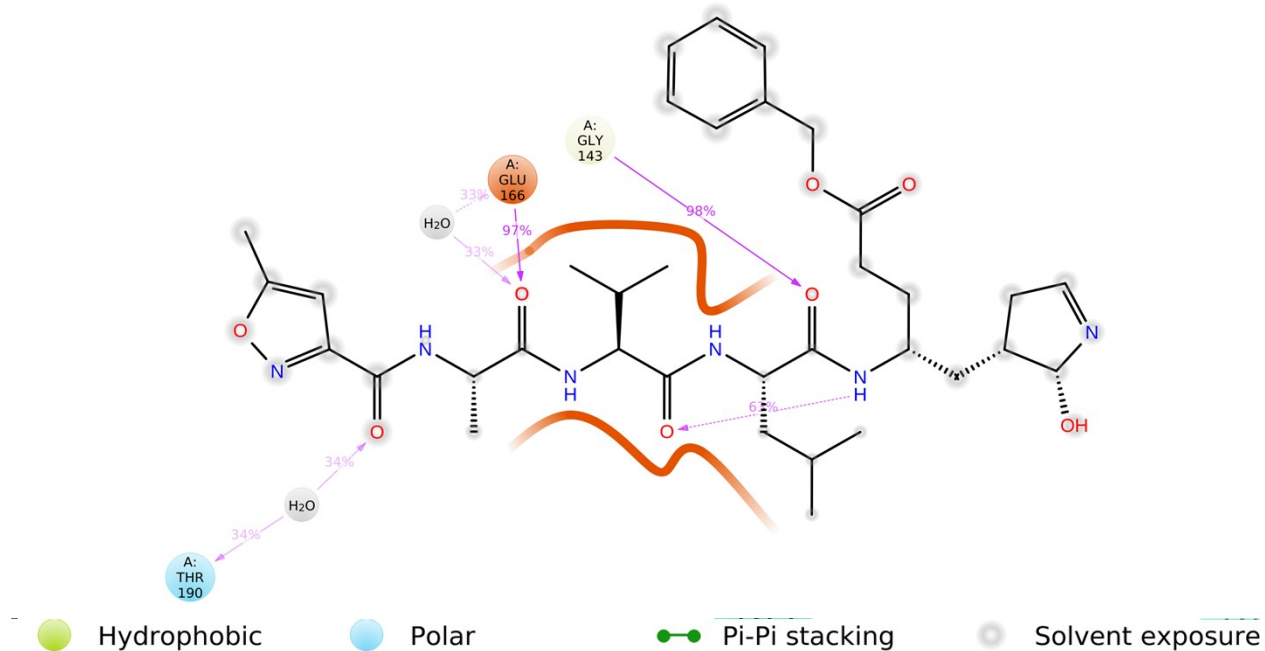

**Figure SI6:** The N3 – 6LU7 Interactions that occur more than 30.0% of the simulation time.

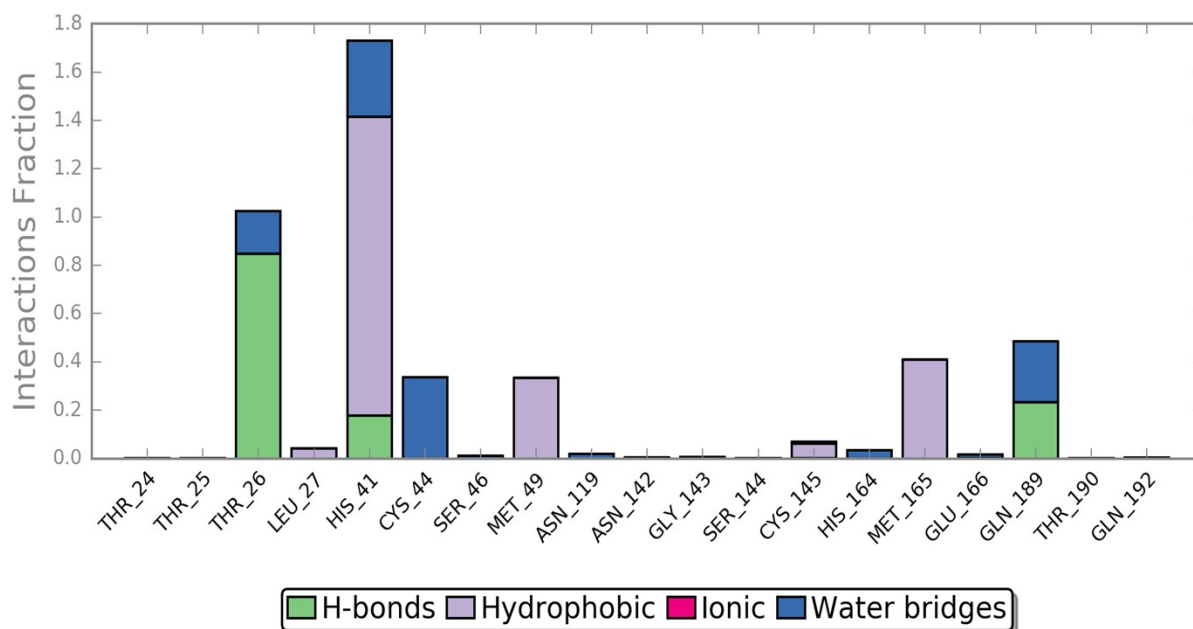

**Figure SI7:** The histogram of IVa – 6LU7 contact throughout the trajectory.

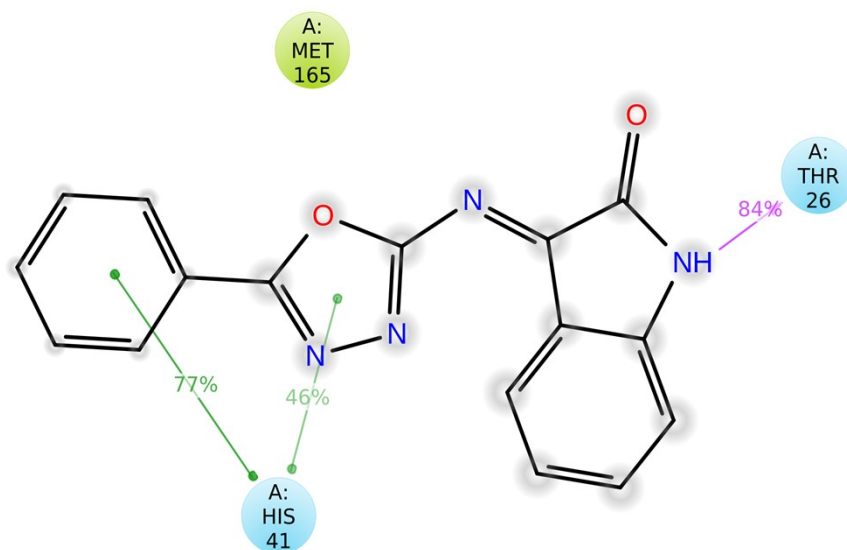

**Figure SI8:** The IVa – 6LU7 Interactions that occur more than 30.0% of the simulation time.

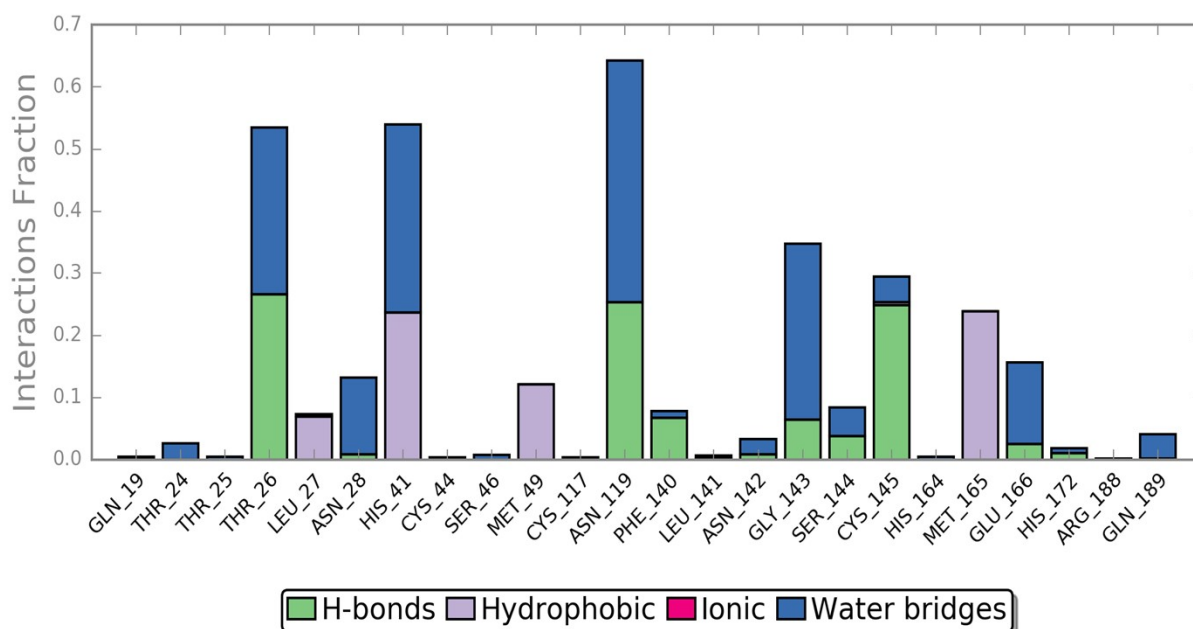

**Figure SI9:** The histogram of IVb – 6LU7 contact throughout the trajectory.

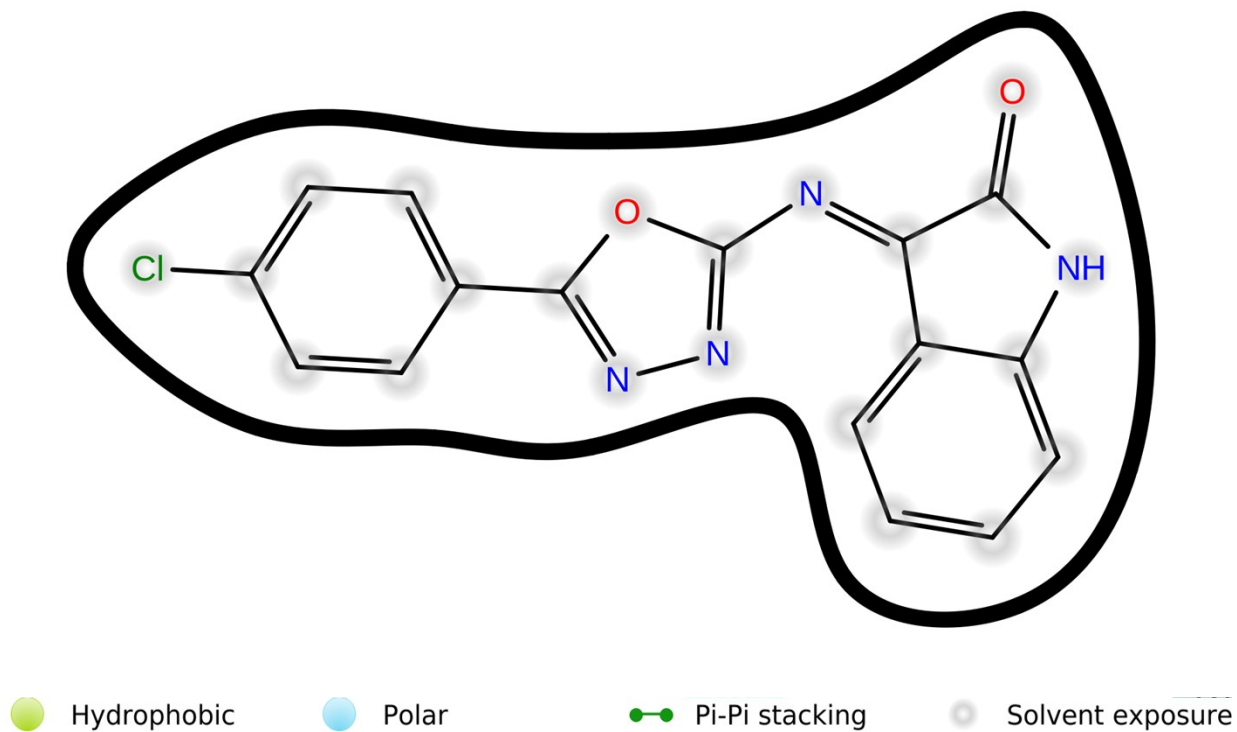

**Figure SI10:** The IV<sub>b</sub> – 6LU7 Interactions that occur more than 30.0% of the simulation time.

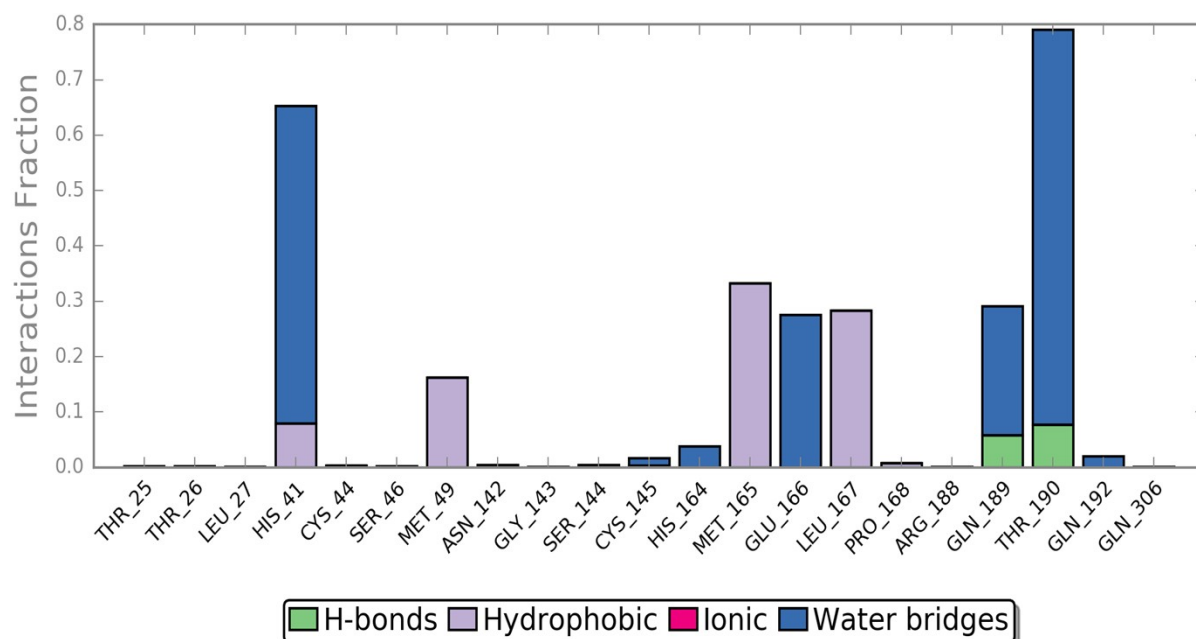

**Figure SI11:** The histogram of IV<sub>e</sub> – 6LU7 contact throughout the trajectory.

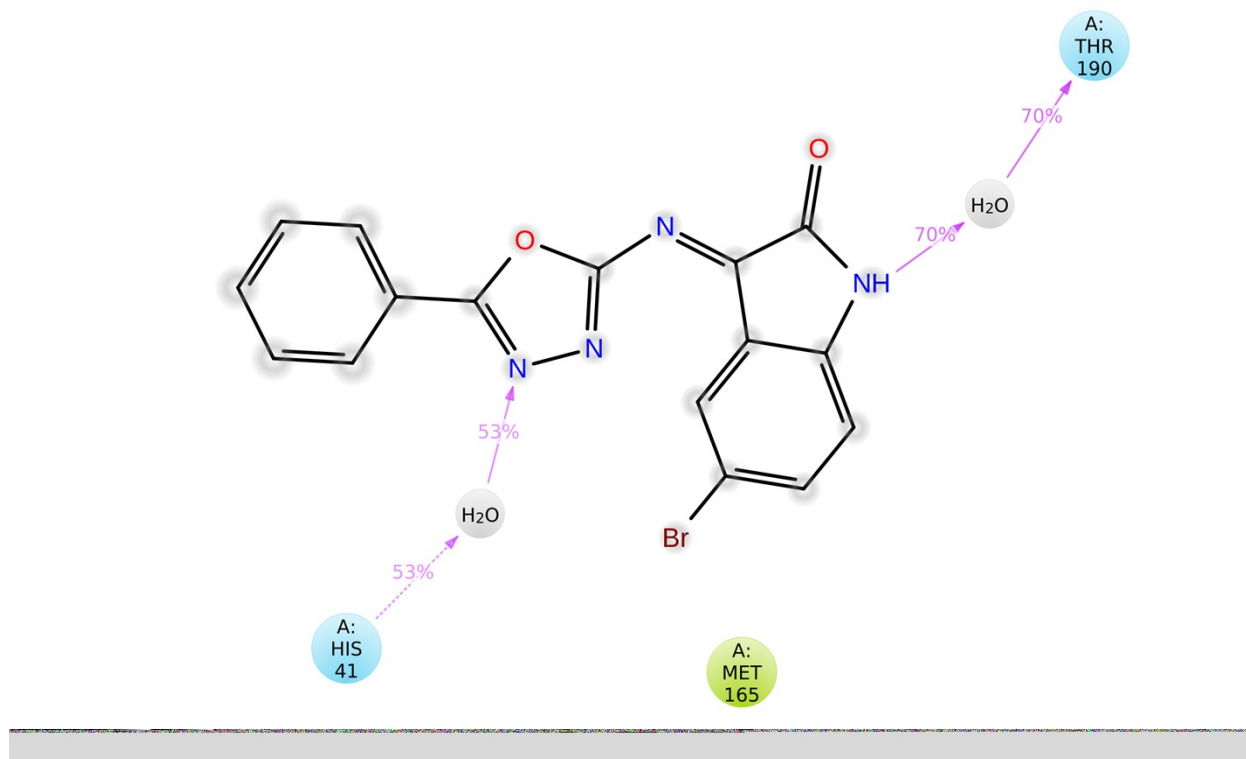

**Figure SI12:** The IV<sub>e</sub> – 6LU7 Interactions that occur more than 30.0% of the simulation time.

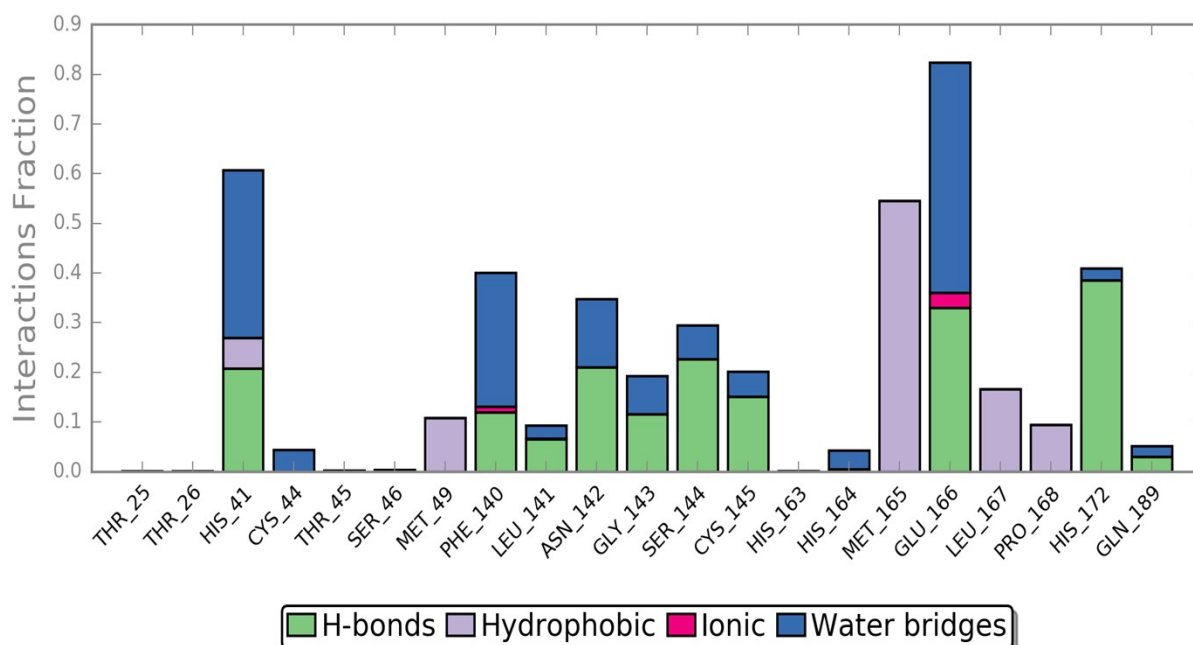

**Figure SI13:** The histogram of I<sub>a</sub> – 6LU7 contact throughout the trajectory.

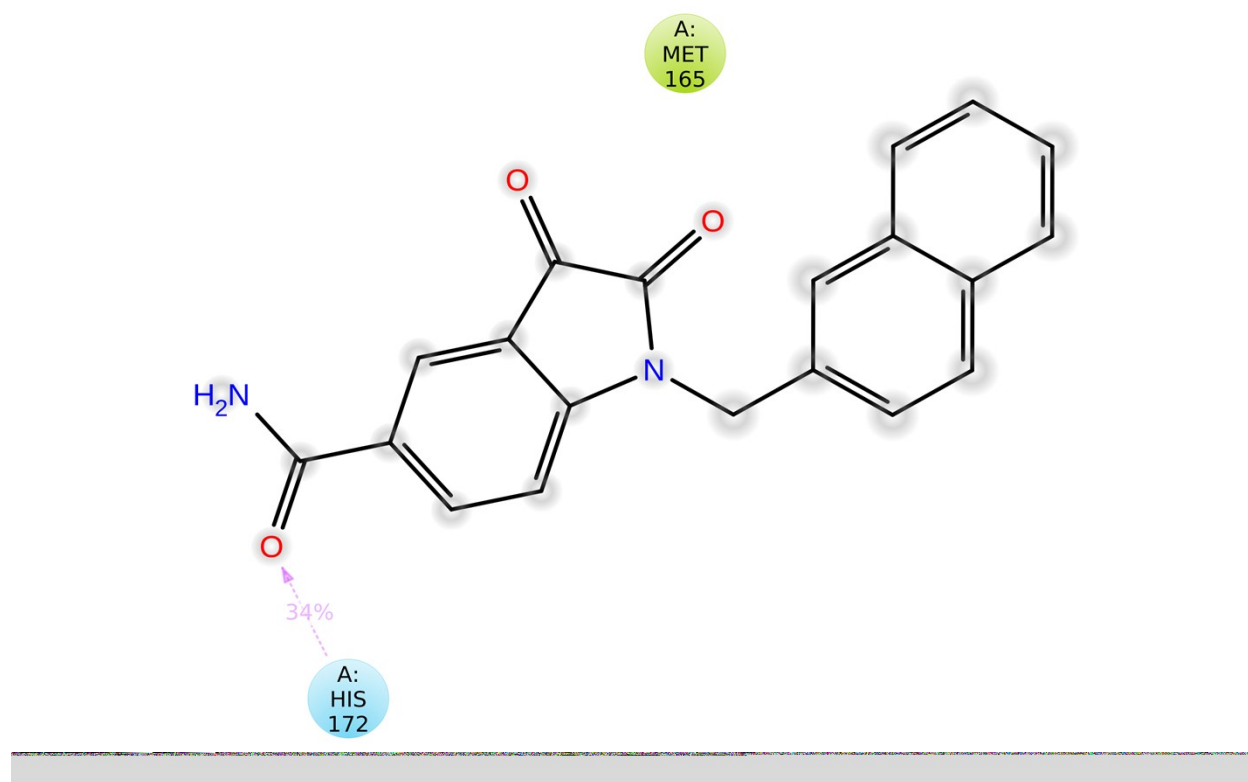

**Figure SI14:** The I<sub>a</sub> – 6LU7 Interactions that occur more than 30.0% of the simulation time.
